# Supplementary material
Source: Springer Nature journal article supplement (https://www.springermedizin.de/resource/supplementary/12916_2009_214_MOESM11_ESM.pdf/9599408)

**Id, Sex, Study name**

**Relative Risk  
95% CI**

**Relative Risk  
95% CI**

**USA**  
5 M Bennington and Laubscher 1968

**4.80 (1.18, 19.59)**

13 M McLaughlin et al 1984

**1.00 (0.37, 2.68)**

19 M+F Yuan et al 1998

**1.02 (0.56, 1.85)**

**Subtotal (95% CI)**

**1.41 (0.64, 3.10)**

**SCANDINAVIA**

3 M Norway Cohorts

**0.72 (0.44, 1.18)**

**Subtotal (95% CI)**

**0.72 (0.44, 1.18)**

**OTHER**

17 M+F McLaughlin et al 1995

**1.30 (0.60, 3.10)**

**Subtotal (95% CI)**

**1.30 (0.57, 2.95)**

**Total (95% CI)**

**1.09 (0.69, 1.71)**

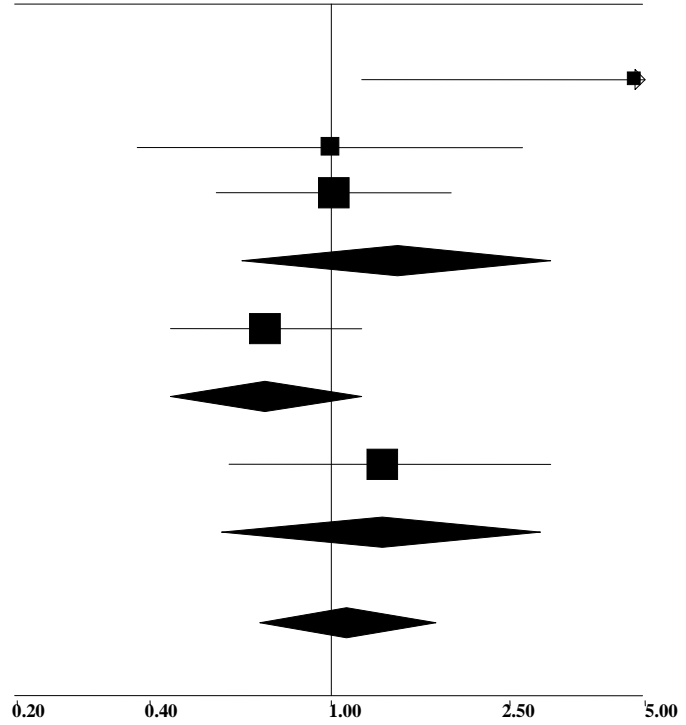

Supplement: MOESM11 [file 9599408]
